# Supplementary material
Source: PubMed Central journal article supplement (PMC6620871)
Supplement: 840221_Supplemental_material.pdf [file 840221_Supplemental_material.pdf]

**Supplementary Table 1. Comparison of causes of death of patients with or without HCC recurrence after receiving a liver transplant at the University Medical Center Mainz between 1998 and 2017.**

|                                 | Patients                  |                        | p-value          |
|---------------------------------|---------------------------|------------------------|------------------|
|                                 | Without recurrence (n=96) | With recurrence (n=37) |                  |
| Cardiovascular disease          | 16                        | 1                      | <b>0.031</b>     |
| De novo malignancy              | 16                        | 0                      | <b>0.008</b>     |
| Recurrence of the liver disease | 9                         | 1                      | 0.191            |
| HCC recurrence                  | 0                         | 34                     | <b>&lt;0.001</b> |
| Infections                      | 22                        | 0                      | <b>0.001</b>     |
| Others                          | 33                        | 1                      | <b>&lt;0.001</b> |

Note: Information on the cause of death was available for 133 of 142 deceased patients.

**Supplementary Table 2. Comparison of additional baseline characteristics of patients with or without HCC recurrence after receiving a liver transplant at the University Medical Center Mainz between 1998 and 2017 (n=304).**

|                                                          | Patients                      |                           | p-value      |
|----------------------------------------------------------|-------------------------------|---------------------------|--------------|
|                                                          | Without recurrence<br>(n=253) | With recurrence<br>(n=51) |              |
| <b>Blood group</b>                                       |                               |                           |              |
| - 0                                                      | 88 (35%)                      | 14 (27%)                  | 0.399        |
| - A                                                      | 118 (47%)                     | 28 (55%)                  |              |
| - B                                                      | 36 (14%)                      | 5 (10%)                   |              |
| - AB                                                     | 11 (4%)                       | 4 (8%)                    |              |
| <b>Pretreatments other than TACE and resection</b>       |                               |                           |              |
| SIRT                                                     | 1 (0%)                        | 1 (2%)                    | 0.207        |
| IRE                                                      | 2 (1%)                        | 1 (2%)                    | 0.441        |
| PEI                                                      | 13 (5%)                       | 3 (6%)                    | 0.828        |
| Sorafenib                                                | 2 (1%)                        | 1 (2%)                    | 0.441        |
| RFA                                                      | 13 (5%)                       | 3 (6%)                    | 0.828        |
| <b>Etiologies other than alcohol and viral hepatitis</b> |                               |                           |              |
| Haemochromatosis                                         | 9 (4%)                        | 3 (6%)                    | 0.437        |
| NASH                                                     | 3 (1%)                        | 3 (6%)                    | <b>0.028</b> |
| AIH                                                      | 2 (1%)                        | 1 (2%)                    | 0.441        |
| PBC                                                      | 9 (4%)                        | 0 (0%)                    | 0.172        |
| PSC                                                      | 1 (0%)                        | 0 (0%)                    | 0.653        |
| <b>Immunosuppression</b>                                 |                               |                           |              |
| Tacrolimus                                               | 241 (95%)                     | 47 (92%)                  | 0.366        |
| Cyclosporine                                             | 11 (4%)                       | 4 (8%)                    | 0.293        |
| Everolimus                                               | 18 (7%)                       | 2 (4%)                    | 0.401        |
| Sirolimus                                                | 10 (4%)                       | 3 (6%)                    | 0.534        |
| MMF                                                      | 153 (60%)                     | 23 (45%)                  | <b>0.042</b> |
| Simulect                                                 | 10 (4%)                       | 1 (2%)                    | 0.487        |
| Imurek                                                   | 4 (2%)                        | 2 (4%)                    | 0.273        |
| mTOR inhibitor                                           | 28 (11%)                      | 5 (10%)                   | 0.791        |

P-values smaller than 0.05 are considered to be statistically significant and are highlighted in bold.

**Supplementary Table 3. Comparison of baseline characteristics of patients with early or late HCC recurrence (defined as diagnosed  $\leq$  or  $>$  2 years after LT; n=51).**

|                                                         | Early recurrence<br>(n=26) | Late recurrence<br>(n=25) | p-value          |
|---------------------------------------------------------|----------------------------|---------------------------|------------------|
| Alive                                                   | 2 (8%)                     | 9 (36%)                   | <b>0.014</b>     |
| Time to last follow-up/death (years)                    | 1.45 (0.62-2.97)           | 6.18 (4.49-8.43)          | <b>&lt;0.001</b> |
| Recurrence-free survival (years)                        | 0.79 (0.40-1.18)           | 3.71 (3.15-4.94)          | <b>&lt;0.001</b> |
| Survival free of intrahepatic recurrence (days)         | 1.26 (0.62-1.84)           | 5.41 (4.39-7.05)          | <b>&lt;0.001</b> |
| Survival free of extrahepatic recurrence (days)         | 0.96 (0.39-1.28)           | 3.71 (3.15-4.99)          | <b>&lt;0.001</b> |
| Time from recurrence until death (days)                 | 237.5 (112.0-640.0)        | 430.5 (307.5-1212.5)      | 0.167            |
| Time on the waiting list (days)                         | 86.5 (55.0-337.0)          | 237.0 (89.0-304.0)        | 0.540            |
| Time from HCC diagnosis until LT (days)*                | 298.0 (198.0-412.0)        | 330.0 (212.0-398.0)       | 0.977            |
| DRI                                                     | 1.435 (1.323-1.816)        | 1.818 (1.368-2.053)       | 0.176            |
| Age                                                     | 60.0 (53.7-63.4)           | 59.9 (54.2-64.1)          | 0.407            |
| Male gender                                             | 16 (62%)                   | 18 (72%)                  | 0.428            |
| LT before Dec 16, 2006 (pre MELD-era)                   | 16 (62%)                   | 13 (52%)                  | 0.492            |
| Cold ischemia time (minutes)                            | 576.0 (450.0-671.0)        | 546.0 (473.0-689.5)       | 0.744            |
| Outside Milan criteria (explant)                        | 18 (69%)                   | 11 (44%)                  | 0.069            |
| Outside Milan but inside UCSF criteria (explant)        | 17 (65%)                   | 8 (32%)                   | <b>0.017</b>     |
| Outside Milan but inside up-to-seven criteria (explant) | 16 (62%)                   | 7 (28%)                   | <b>0.016</b>     |
| T stage (explant)                                       |                            |                           |                  |
| - T0, T1 and T2                                         | 14 (54%)                   | 22 (88%)                  | <b>0.007</b>     |
| - T3 and T4                                             | 12 (46%)                   | 3 (12%)                   |                  |
| Grading                                                 |                            |                           |                  |
| - G1                                                    | 2 (8%)                     | 5 (20%)                   | <b>0.041</b>     |
| - G2                                                    | 12 (46%)                   | 16 (64%)                  |                  |
| - G3                                                    | 12 (46%)                   | 3 (12%)                   |                  |
| - Gx                                                    | 0 (0%)                     | 1 (4%)                    |                  |
| Number of tumour nodules                                |                            |                           |                  |
| - <3                                                    | 9 (35%)                    | 17 (68%)                  | <b>0.017</b>     |
| - multifocal                                            | 17 (65%)                   | 8 (32%)                   |                  |
| Nodule size >5 cm                                       | 8 (31%)                    | 3 (12%)                   | 0.103            |
| Microvascular invasion                                  | 13 (50%)                   | 3 (12%)                   | <b>0.003</b>     |
| AFP (ng/mL) before LT                                   | 12.2 (5.1-236.0)           | 5.6 (3.0-10.7)            | <b>0.011</b>     |
| AFP (ng/mL) before TACE                                 | 132.5 (6.2-681.0)          | 10.3 (3.3-53.0)           | <b>0.031</b>     |
| AFP before LT >400 ng/mL                                | 5 (15%)                    | 1 (4%)                    | 0.072            |
| Absence of vital tumour tissue in the explant           | 2 (8%)                     | 3 (12%)                   | 0.605            |
| Pretreatment                                            |                            |                           |                  |
| - with TACE                                             | 20 (77%)                   | 22 (88%)                  | 0.300            |
| - with resection                                        | 6 (23%)                    | 2 (8%)                    | 0.139            |
| - other than resection or TACE                          | 5 (19%)                    | 3 (12%)                   | 0.478            |
| Number of TACE                                          |                            |                           |                  |
| - 0                                                     | 6 (23%)                    | 3 (12%)                   | 0.667            |
| - 1 to 3                                                | 7 (27%)                    | 7 (28%)                   |                  |
| - 4 to 6                                                | 8 (31%)                    | 11 (44%)                  |                  |
| - 7 or more                                             | 5 (19%)                    | 4 (16%)                   |                  |
| Modality of pre-LT HCC diagnosis                        |                            |                           |                  |
| - incidentaloma                                         | 1 (4%)                     | 0 (0%)                    | 0.186            |
| - radiological evidence                                 | 6 (23%)                    | 2 (8%)                    |                  |
| - histology                                             | 19 (73%)                   | 23 (92%)                  |                  |

|                                           |                 |                |              |
|-------------------------------------------|-----------------|----------------|--------------|
| Histological confirmation by liver biopsy | 13 (50%)        | 21 (84%)       | <b>0.010</b> |
| Etiology                                  |                 |                |              |
| - Alcohol                                 | 11 (42%)        | 9 (36%)        | 0.645        |
| - Hepatitis B                             | 5 (19%)         | 5 (20%)        | 0.945        |
| - Hepatitis B+D                           | 2 (8%)          | 0 (0%)         | 0.157        |
| - Hepatitis C                             | 11 (42%)        | 8 (32%)        | 0.447        |
| Child-Pugh class                          |                 |                |              |
| - Child A                                 | 10 (38%)        | 16 (64%)       | 0.361        |
| - Child B                                 | 7 (27%)         | 5 (20%)        |              |
| - Child C                                 | 6 (23%)         | 4 (16%)        |              |
| MELD-score                                | 11.0 (7.5-13.6) | 9.0 (7.0-12.0) | 0.325        |

Continuous variables are expressed as median with IQRs in brackets, categorical variables as n and frequencies (%). P-Values smaller than 0.05 are considered to be statistically significant and are highlighted in bold.

\*excluding patients with incidentalomas.

**Supplementary Table 4. Comparison of additional baseline characteristics of patients with early or late HCC recurrence (defined as diagnosed  $\leq$  or  $>$  2 years after LT; n=51).**

|                                                          | Early recurrence (n=26) | Late recurrence (n=25) | p-value |
|----------------------------------------------------------|-------------------------|------------------------|---------|
| <b>Blood group</b>                                       |                         |                        |         |
| - 0                                                      | 8 (31%)                 | 6 (24%)                | 0.894   |
| - A                                                      | 13 (50%)                | 15 (60%)               |         |
| - B                                                      | 3 (12%)                 | 2 (8%)                 |         |
| - AB                                                     | 2 (8%)                  | 2 (8%)                 |         |
| <b>Pretreatments other than TACE and resection</b>       |                         |                        |         |
| SIRT                                                     | 0 (0%)                  | 1 (4%)                 | 0.303   |
| IRE                                                      | 1 (4%)                  | 0 (0%)                 | 0.322   |
| PEI                                                      | 1 (4%)                  | 2 (8%)                 | 0.529   |
| Sorafenib                                                | 0 (0%)                  | 1 (4%)                 | 0.303   |
| RFA                                                      | 3 (12%)                 | 0 (0%)                 | 0.080   |
| <b>Etiologies other than alcohol and viral hepatitis</b> |                         |                        |         |
| Haemochromatosis                                         | 1 (4%)                  | 2 (8%)                 | 0.529   |
| NASH                                                     | 1 (4%)                  | 2 (8%)                 | 0.529   |
| AIH                                                      | 0 (0%)                  | 1 (4%)                 | 0.303   |
| <b>T stage (explant)</b>                                 |                         |                        |         |
| - T0                                                     | 2 (8%)                  | 4 (16%)                | 0.091   |
| - T1                                                     | 3 (12%)                 | 7 (28%)                |         |
| - T2                                                     | 9 (35%)                 | 11 (44%)               |         |
| - T3                                                     | 11 (42%)                | 3 (12%)                |         |
| - T4                                                     | 1 (4%)                  | 0 (0%)                 |         |
| <b>Number of tumour nodules</b>                          |                         |                        |         |
| - 0                                                      | 2 (8%)                  | 3 (12%)                | 0.157   |
| - 1                                                      | 3 (12%)                 | 9 (36%)                |         |
| - 2                                                      | 2 (8%)                  | 2 (8%)                 |         |
| - 3                                                      | 2 (8%)                  | 3 (12%)                |         |
| - multifocal                                             | 17 (65%)                | 8 (32%)                |         |
| <b>Immunosuppression</b>                                 |                         |                        |         |
| Tacrolimus                                               | 25 (96%)                | 22 (88%)               | 0.279   |
| Cyclosporine                                             | 1 (4%)                  | 3 (12%)                | 0.279   |
| Everolimus                                               | 1 (4%)                  | 1 (4%)                 | 0.977   |
| Sirolimus                                                | 2 (8%)                  | 1 (4%)                 | 0.575   |
| MMF                                                      | 11 (42%)                | 12 (48%)               | 0.683   |
| Simulect                                                 | 0 (0%)                  | 1 (4%)                 | 0.303   |
| Imurek                                                   | 1 (4%)                  | 1 (4%)                 | 0.977   |
| mTOR inhibitor                                           | 3 (12%)                 | 2 (8%)                 | 0.671   |

**Supplementary Table 5. Sites of HCC recurrence and their influence on survival.**

|                                                              | Number of patients | Survival (years) | Log-rank p-value |
|--------------------------------------------------------------|--------------------|------------------|------------------|
| Intra- vs. extrahepatic HCC recurrence (first manifestation) |                    |                  |                  |
| - intrahepatic recurrence                                    | 10 (20%)           | 2.8 (0.3-5.3)    | 0.86             |
| - extrahepatic recurrence                                    | 36 (71%)           | 4.4 (3.1-5.7)    |                  |
| - simultaneous recurrence                                    | 5 (10%)            | 5.8 (2.9-8.8)    |                  |
| Intra- vs. extrahepatic HCC recurrence (any time-point)      |                    |                  |                  |
| - intrahepatic recurrence                                    | 9 (18%)            | 3.0 (2.4-3.5)    | 0.65             |
| - extrahepatic recurrence                                    | 27 (53%)           | 3.9 (2.4-5.4)    |                  |
| - intra- and extrahepatic recurrence                         | 15 (29%)           | 4.5 (3.5-5.5)    |                  |
| Distinct sites                                               |                    |                  |                  |
| - hepatic recurrence                                         | 24 (47%)           | 3.9 (1.7-6.1)    | 0.38             |
| - pulmonary recurrence                                       | 26 (51%)           | 3.9 (2.4-5.4)    | 0.90             |
| - bone recurrence                                            | 18 (35%)           | 3.3 (0.4-6.2)    | 0.49             |
| - adrenal recurrence                                         | 10 (20%)           | 1.6 (0.8-2.4)    | 0.30             |
| - lymph node recurrence                                      | 7 (14%)            | 3.4 (3.0-3.8)    | 0.35             |
| - needle tract seeding                                       | 8 (16%)            | 9.7 (6.8-12.6)   | <b>0.023</b>     |
| - other recurrence                                           | 11 (22%)           | 5.8 (2.1-9.5)    | 0.75             |

Survival is expressed as years with 95% confidence intervals in brackets. Log-rank p-values smaller than 0.05 are considered to be statistically significant and are highlighted in bold.

**Supplementary Table 6. Sites of early and late HCC recurrence (defined as diagnosed  $\leq$  or  $>$  2 years after LT; n=51).**

|                                                              | Early recurrence<br>(n=26) | Late recurrence<br>(n=25) | p-value      |
|--------------------------------------------------------------|----------------------------|---------------------------|--------------|
| Intra- vs. extrahepatic HCC recurrence (first manifestation) |                            |                           |              |
| - intrahepatic recurrence                                    | 7 (27%)                    | 3 (12%)                   | 0.388        |
| - extrahepatic recurrence                                    | 17 (65%)                   | 19 (76%)                  |              |
| - simultaneous recurrence                                    | 2 (8%)                     | 3 (12%)                   |              |
| Intra- vs. extrahepatic HCC recurrence (any time-point)      |                            |                           |              |
| - intrahepatic recurrence                                    | 6 (23%)                    | 3 (12%)                   | 0.501        |
| - extrahepatic recurrence                                    | 12 (46%)                   | 15 (60%)                  |              |
| - intra- and extrahepatic recurrence                         | 8 (31%)                    | 7 (28%)                   |              |
| Distinct sites                                               |                            |                           |              |
| - hepatic recurrence                                         | 14 (54%)                   | 10 (40%)                  | 0.322        |
| - pulmonary recurrence                                       | 13 (50%)                   | 13 (52%)                  | 0.886        |
| - bone recurrence                                            | 11 (42%)                   | 7 (28%)                   | 0.285        |
| - adrenal recurrence                                         | 7 (27%)                    | 3 (12%)                   | 0.180        |
| - lymph node recurrence                                      | 4 (15%)                    | 3 (12%)                   | 0.725        |
| - needle tract seeding                                       | 0 (0%)                     | 8 (32%)                   | <b>0.002</b> |
| - other recurrence                                           | 5 (19%)                    | 6 (24%)                   | 0.679        |

P-values smaller than 0.05 are considered to be statistically significant and are highlighted in bold.
